# Supplementary material for: Acute effects of variable resistance training on force, velocity, and power measures: a systematic review and meta-analysis
Source: PeerJ. 2022 Aug 17;10:e13870. doi: 10.7717/peerj.13870 (PMC9392455; doi:10.7717/peerj.13870)
Supplement: Data S1 [file peerj-10-13870-s002.xlsx]

## Sheet: Peak Force
N	study	exp_n	exp_m	exp_sd	cont_n	cont_m	cont_sd		loading comparision	equipment	RM	exericse
1	Galpin et al., 2015 (a1)	12	2359	245	12	2439	264		equal	EB	0.09	deadlift
2	Galpin et al., 2015 (a2)	12	2292	236	12	2439	264		equal	EB	0.21	deadlift
3	Galpin et al., 2015 (b1)	12	2586	218	12	2742	247		equal	EB	0.13	deadlift
4	Galpin et al., 2015 (b2)	12	2482	247	12	2742	247		equal	EB	0.3	deadlift
5	Wallace et al., 2006 (a1)	10	2061	873	10	2166	717		equal	EB	0.12	back squat
6	Wallace et al., 2006 (a2)	10	2079	856	10	2166	717		equal	EB	0.21	back squat
7	Wallace et al., 2006 (b1)	10	2498	820	10	2253	803		equal	EB	0.17	back squat
8	Wallace et al., 2006 (b2)	10	2620	855	10	2253	803		equal	EB	0.3	back squat
9	Swinton et al., 2011 (a1)	23	2833	445	23	2774	439		equal	CH	0.2	deadlift
10	Swinton et al., 2011 (a2)	23	2887	447	23	2774	439		equal	CH	0.4	deadlift
11	Swinton et al., 2011 (b1)	23	3002	456	23	2899	446		equal	CH	0.2	deadlift
12	Swinton et al., 2011 (b2)	23	3080	457	23	2899	446		equal	CH	0.4	deadlift
13	Swinton et al., 2011 (c1)	23	3251	473	23	3060	457		equal	CH	0.2	deadlift
14	Swinton et al., 2011 (c2)	23	3349	474	23	3060	457		equal	CH	0.4	deadlift
15	Coker et al., 2006 (a)	7	1036.61	395.9	7	1041.95	371.87		CRT↑	CH	0.05	snatch
16	Coker et al., 2006 (b)	7	1069.48	350.96	7	1032.09	374.18		CRT↑	CH	0.05	snatch
17	Ebben et al., 2002 (a)	11	1528	344.4	11	1603	360.8		CRT↑	EB	0.09	back squat
18	Ebben et al., 2002 (b)	11	1603	311.4	11	1603	360.8		CRT↑	CH	0.09	back squat
19	Nijem et al., 2016	13	1719	186.4	13	1821.4	170.6		CRT↑	CH	0.17	deadlift
20	Kampanart et al., 2016 (a)	6	2232.67	593.39	6	2176.18	617.98		VRT↑	EB	0.09	clean pull
21	Kampanart et al., 2016 (b)	6	2246.43	606.43	6	2176.18	617.98		VRT↑	EB	0.18	clean pull
22	Stevenson et al., 2010	20	2564.63	396.09	20	2536.97	374.89		VRT↑	EB	0.11	back squat
23	Andersen et al., 2020	16	2673	124	16	2525	144		equal	EB	0.48	deadlift
24	Berning et al., 2008 (a)	7	1136.08	297.17	7	1053.04	282.68		CRT↑	CH	0.05	clean
25	Berning et al., 2008 (b)	7	1122.48	307.45	7	1128.37	300.52		CRT↑	CH	0.05	clean

## Sheet: Average Force
N	study	exp_n	exp_m	exp_sd	cont_n	cont_m	cont_sd		loading comparision	equipment	RM	exericse
1	Kubo et al., 2018 (a)	10	536.11	97.22	10	466.67	88.89		equal	EB	0.11	back squat
2	Kubo et al., 2018 (b)	10	575	114	10	466.67	88.89		equal	EB	0.22	back squat
3	Kubo et al., 2018 (c)	10	641.67	144.45	10	466.67	88.89		equal	EB	0.34	back squat
4	Kubo et al., 2018 (d)	10	750	139	10	466.67	88.89		equal	EB	0.45	back squat
5	Galpin et al., 2015 (a1)	12	1488	163	12	1568	182		equal	EB	0.09	deadlift
6	Galpin et al., 2015 (a2)	12	1415	168	12	1568	182		equal	EB	0.21	deadlift
7	Galpin et al., 2015 (b1)	12	1720	151	12	1875	181		equal	EB	0.13	deadlift
8	Galpin et al., 2015 (b2)	12	1617	154	12	1875	181		equal	EB	0.3	deadlift
9	Ebben et al., 2002 (a)	11	1238	320.4	11	1260	301.4		CRT↑	EB	0.09	back squat
10	Ebben et al., 2002 (b)	11	1229	308.6	11	1260	301.4		CRT↑	CH	0.09	back squat
11	Andersen et al., 2020	16	2366	118	16	2298	128		equal	EB	0.48	deadlift

## Sheet: Peak Velocity
N	study	exp_n	exp_m	exp_sd	cont_n	cont_m	cont_sd		loading comparision	equipment	RM	exericse
1	Garcia-Lopez et al., 2016 (a)	16	0.27	0.03	16	0.23	0.04		equal	EB	0.36	bench press
2	Garcia-Lopez et al., 2016 (b)	16	0.26	0.03	16	0.22	0.03		equal	EB	0.36	bench press
3	Galpin et al., 2015 (a1)	12	1.3	0.2	12	1.1	0.2		equal	EB	0.09	deadlift
4	Galpin et al., 2015 (a2)	12	1.4	0,2	12	1.1	0.2		equal	EB	0.21	deadlift
5	Galpin et al., 2015 (b1)	12	0.9	0.2	12	0.7	0.2		equal	EB	0.13	deadlift
6	Galpin et al., 2015 (b2)	12	1	0.2	12	0.7	0.2		equal	EB	0.3	deadlift
7	Swinton et al., 2011 (a1)	23	1.8	0.22	23	2.2	0.23		equal	CH	0.2	deadlift
8	Swinton et al., 2011 (a2)	23	1.7	0.22	23	2.2	0.23		equal	CH	0.4	deadlift
9	Swinton et al., 2011 (b1)	23	1.3	0.2	23	1.7	0.2		equal	CH	0.2	deadlift
10	Swinton et al., 2011 (b2)	23	1.2	0.19	23	1.7	0.2		equal	CH	0.4	deadlift
11	Swinton et al., 2011 (c1)	23	0.9	0.2	23	1.2	0.22		equal	CH	0.2	deadlift
12	Swinton et al., 2011 (c2)	23	0.8	0.21	23	1.2	0.22		equal	CH	0.4	deadlift
13	Heelas et al., 2019 (a)	15	1.4	0.2	15	1.2	0.2		CRT↑	EB	0.11	deadlift
14	Heelas et al., 2019 (b)	15	1.4	0.2	15	1.2	0.2		CRT↑	EB	0.13	deadlift
15	Heelas et al., 2019 (c)	15	1.4	0.3	15	1.2	0.2		CRT↑	EB	0.16	deadlift
16	Godwin et al., 2018	8	13.9	14.5	8	13.5	16		CRT↑	CH	0.15	bench press throw
17	Baker et al., 2009	13	0.8	0.13	13	0.7	0.1		CRT↑	CH	0.14	bench press
18	Coker et al., 2006 (a)	7	2.04	0.17	7	2.13	0.2		CRT↑	CH	0.05	snatch
19	Coker et al., 2006 (b)	7	1.08	0.06	7	1.07	0.04		CRT↑	CH	0.05	snatch
20	Saeterbakken et al., 2016	20	0.43	0.17	20	0.53	0.17		VRT↑	EB	0.11	back squat
21	Kampanart et al., 2016 (a)	6	1.17	0.15	6	1.12	0.11		VRT↑	EB	0.09	clean pull
22	Kampanart et al., 2016 (b)	6	1.03	0.08	6	1.12	0.11		VRT↑	EB	0.18	clean pull
23	Stevenson et al., 2010	20	1.28	0.11	20	1.33	0.09		VRT↑	EB	0.11	back squat
24	Andersen et al., 2020	16	0.56	0.1	16	0.59	0.1		equal	EB	0.48	deadlift
25	Berning et al., 2008 (a)	7	1.7	0.12	7	1.68	0.15		CRT↑	CH	0.05	clean
26	Berning et al., 2008 (b)	7	1.62	0.1	7	1.67	0.14		CRT↑	CH	0.05	clean

## Sheet: Average Velocity
N	study	exp_n	exp_m	exp_sd	cont_n	cont_m	cont_sd		loading comparision	equipment	RM	exericse
1	Kubo et al., 2018 (a)	10	0.86	0.12	10	0.76	0.14		equal	EB	0.11	back squat
2	Kubo et al., 2018 (b)	10	0.91	0.12	10	0.76	0.14		equal	EB	0.22	back squat
3	Kubo et al., 2018 (c)	10	0.95	0.17	10	0.76	0.14		equal	EB	0.34	back squat
4	Kubo et al., 2018 (d)	10	0.99	0.13	10	0.76	0.14		equal	EB	0.45	back squat
5	Garcia-Lopez et al., 2016 (a)	16	0.197	0.15	16	0.172	0.03		equal	EB	0.36	bench press
6	Garcia-Lopez et al., 2016 (b)	16	0.185	0.02	16	0.173	0.02		equal	EB	0.36	bench press
7	Galpin et al., 2015 (a1)	12	0.6	0.1	12	0.5	0.1		equal	EB	0.09	deadlift
8	Galpin et al., 2015 (a2)	12	0.7	0.1	12	0.5	0.1		equal	EB	0.21	deadlift
9	Galpin et al., 2015 (b1)	12	0.4	0.1	12	0.3	0.1		equal	EB	0.13	deadlift
10	Galpin et al., 2015 (b2)	12	0.5	0.1	12	0.3	0.1		equal	EB	0.3	deadlift
11	Baker et al., 2009	13	0.62	0.09	13	0.56	0.08		CRT↑	CH	0.14	bench press
12	Heelas et al., 2019 (a)	15	0.8	0.1	15	0.7	0.1		CRT↑	EB	0.11	deadlift
13	Heelas et al., 2019 (b)	15	0.9	0.2	15	0.7	0.1		CRT↑	EB	0.13	deadlift
14	Heelas et al., 2019 (c)	15	0.9	0.2	15	0.7	0.1		CRT↑	EB	0.16	deadlift
15	Godwin et al., 2018	8	8.7	9.5	8	8.4	9.2		CRT↑	CH	0.15	bench press throw
16	Stevenson et al., 2010	20	0.79	0.09	20	0.81	0.05		VRT↑	EB	0.11	back squat
17	Andersen et al., 2020	16	0.35	0.06	16	0.33	0.05		equal	EB	0.48	deadlift

## Sheet: Eccentric Peak Velocity
N	study	exp_n	exp_m	exp_sd	cont_n	cont_m	cont_sd		loading comparision	equipment	RM	exericse
1	Baker et al., 2009	13	1.44	0.27	13	1.22	0.25		CRT↑	CH	0.14	bench press
2	Stevenson et al., 2010	20	1.42	0.19	20	1.38	0.15		VRT↑	EB	0.11	back squat

## Sheet: Peak Power
N	study	exp_n	exp_m	exp_sd	cont_n	cont_m	cont_sd		loading comparision	equipment	RM	exericse
1	Galpin et al., 2015 (a1)	12	2654	485	12	2439	435		equal	EB	0.09	deadlift
2	Galpin et al., 2015 (a2)	12	2721	456	12	2439	435		equal	EB	0.21	deadlift
3	Galpin et al., 2015 (b1)	12	2230	571	12	1894	511		equal	EB	0.13	deadlift
4	Galpin et al., 2015 (b2)	12	2453	631	12	1894	511		equal	EB	0.3	deadlift
5	Wallace et al., 2006 (a1)	10	1426	1101	10	1496	1031		equal	EB	0.12	back squat
6	Wallace et al., 2006 (a2)	10	1623	1341	10	1496	1031		equal	EB	0.21	back squat
7	Wallace et al., 2006 (b1)	10	2866	1891	10	2301	1637		equal	EB	0.17	back squat
8	Wallace et al., 2006 (b2)	10	2498	2076	10	2301	1637		equal	EB	0.3	back squat
9	Swinton et al., 2011 (a1)	23	3907	659	23	4247	695		equal	CH	0.2	deadlift
10	Swinton et al., 2011 (a2)	23	3780	653	23	4247	695		equal	CH	0.4	deadlift
11	Swinton et al., 2011 (b1)	23	3297	585	23	4021	624		equal	CH	0.2	deadlift
12	Swinton et al., 2011 (b2	23	3136	574	23	4021	624		equal	CH	0.4	deadlift
13	Swinton et al., 2011 (c1)	23	2205	446	23	2827	480		equal	CH	0.2	deadlift
14	Swinton et al., 2011 (c2)	23	2091	440	23	2827	480		equal	CH	0.4	deadlift
15	Heelas et al., 2019 (a)	15	1493.4	462.3	15	1285.8	409.9		CRT↑	EB	0.11	deadlift
16	Heelas et al., 2019 (b)	15	1548.7	515.8	15	1285.8	409.9		CRT↑	EB	0.13	deadlift
17	Heelas et al., 2019 (c)	15	1576.1	533	15	1285.8	409.9		CRT↑	EB	0.16	deadlift
18	Godwin et al., 2018	8	732.7	132.9	8	732.7	134.9		CRT↑	CH	0.15	bench press throw
19	Kampanart et al., 2016 (a)	6	2439.62	862.36	6	2193.62	739.61		VRT↑	EB	0.09	clean pull
20	Kampanart et al., 2016 (b)	6	2137.73	647.87	6	2193.62	739.61		VRT↑	EB	0.18	clean pull
21	Stevenson et al., 2010	20	2647.29	504.13	20	2625.14	501.99		VRT↑	EB	0.11	back squat

## Sheet: Average Power
N	study	exp_n	exp_m	exp_sd	cont_n	cont_m	cont_sd		loading comparision	equipment	RM	exericse
1	Kubo et al., 2018 (a)	10	534.9	88.8	10	437	88.8		equal	EB	0.11	back squat
2	Kubo et al., 2018 (b)	10	607.7	95.6	10	437	88.8		equal	EB	0.22	back squat
3	Kubo et al., 2018 (c)	10	723.8	116.1	10	437	88.8		equal	EB	0.34	back squat
4	Kubo et al., 2018 (d)	10	871.7	198	10	437	88.8		equal	EB	0.45	back squat
5	Galpin et al., 2015 (a1)	12	1234	205	12	1120	195		equal	EB	0.09	deadlift
6	Galpin et al., 2015 (a2)	12	1250	231	12	1120	195		equal	EB	0.21	deadlift
7	Galpin et al., 2015 (b1)	12	1075	221	12	815	168		equal	EB	0.13	deadlift
8	Galpin et al., 2015 (b2)	12	1124	301	12	815	168		equal	EB	0.3	deadlift
9	Heelas et al., 2019 (a)	15	835.7	151.3	15	722.6	138.6		CRT↑	EB	0.11	deadlift
10	Heelas et al., 2019 (b)	15	857.3	164.4	15	722.6	138.6		CRT↑	EB	0.13	deadlift
11	Heelas et al., 2019 (c)	15	884	182.5	15	722.6	138.6		CRT↑	EB	0.16	deadlift
12	Godwin et al., 2018	8	403.4	64.4	8	397.9	62.2		CRT↑	CH	0.15	bench press throw

## Sheet: RFD
N	study	exp_n	exp_m	exp_sd	cont_n	cont_m	cont_sd		loading comparision	equipment	RM	exericse
1	Galpin et al., 2015 (a1)	12	5321	1490	12	5114	1286		equal	EB	0.09	deadlift
2	Galpin et al., 2015 (a2)	12	5939	2064	12	5114	1286		equal	EB	0.21	deadlift
3	Galpin et al., 2015 (b1)	12	4516	1218	12	3973	1329		equal	EB	0.13	deadlift
4	Galpin et al., 2015 (b2)	12	5342	1576	12	3973	1329		equal	EB	0.3	deadlift
5	Wallace et al., 2006 (a1)	10	2926	2250	10	2882	2794		equal	EB	0.12	back squat
6	Wallace et al., 2006 (a2)	10	3397	2808	10	2882	2794		equal	EB	0.21	back squat
7	Wallace et al., 2006 (b1)	10	3205	2353	10	3118	2132		equal	EB	0.17	back squat
8	Wallace et al., 2006 (b2)	10	3529	2721	10	3118	2132		equal	EB	0.3	back squat
9	Swinton et al., 2011 (a1)	23	7199	3583	23	7658	3853		equal	CH	0.2	deadlift
10	Swinton et al., 2011 (a2)	23	7199	3621	23	7658	3853		equal	CH	0.4	deadlift
11	Swinton et al., 2011 (b1)	23	8537	3676	23	9485	3911		equal	CH	0.2	deadlift
12	Swinton et al., 2011 (b2	23	8252	3676	23	9485	3911		equal	CH	0.4	deadlift
13	Swinton et al., 2011 (c1)	23	9536	4057	23	11219	4362		equal	CH	0.2	deadlift
14	Swinton et al., 2011 (c2)	23	9256	4013	23	11219	4362		equal	CH	0.4	deadlift
15	Coker et al., 2006 (a)	7	1078.41	58.02	7	1120.72	147.2		CRT↑	CH	0.05	snatch
16	Coker et al., 2006 (b)	7	1060.61	96.92	7	1039.76	100.16		CRT↑	CH	0.05	snatch
17	Nijem et al., 2016	13	4128.1	2075.4	13	5155.7	2577.6		CRT↑	CH	0.17	deadlift
18	Stevenson et al., 2010	20	1583.14	525.05	20	1459.27	525.37		VRT↑	EB	0.11	back squat
19	Berning et al., 2008 (a)	7	1216.11	100.27	7	1228.73	73.24		CRT↑	CH	0.05	clean
20	Berning et al., 2008 (b)	7	1273.44	139.28	7	1350.42	186.44		CRT↑	CH	0.05	clean
