# Supplementary material for: Acute effects of variable resistance training on force, velocity, and power measures: a systematic review and meta-analysis
Source: PeerJ. 2022 Aug 17;10:e13870. doi: 10.7717/peerj.13870 (PMC9392455; doi:10.7717/peerj.13870)
Supplement: Dataset S1 [file peerj-10-13870-s003.xlsx]

## Sheet: PF(pooled)
studyID	effectsizeID	y	v	RM	equipment	loading comparision		CRT	VRT	EQU	CH	EB
1	1	-0.31	0.17	0.09	EB	equal		0	0	1	0	1
1	2	-0.59	0.17	0.21	EB	equal		0	0	1	0	1
1	3	-0.67	0.18	0.13	EB	equal		0	0	1	0	1
1	4	-1.05	0.19	0.3	EB	equal		0	0	1	0	1
2	5	-0.13	0.2	0.12	EB	equal		0	0	1	0	1
2	6	-0.11	0.2	0.21	EB	equal		0	0	1	0	1
2	7	0.3	0.2	0.17	EB	equal		0	0	1	0	1
2	8	0.44	0.2	0.3	EB	equal		0	0	1	0	1
3	9	0.13	0.09	0.2	CH	equal		0	0	1	1	0
3	10	0.26	0.09	0.4	CH	equal		0	0	1	1	0
3	11	0.23	0.09	0.2	CH	equal		0	0	1	1	0
3	12	0.4	0.09	0.4	CH	equal		0	0	1	1	0
3	13	0.41	0.09	0.2	CH	equal		0	0	1	1	0
3	14	0.62	0.09	0.4	CH	equal		0	0	1	1	0
4	15	-0.01	0.29	0.05	CH	CRT↑		1	0	0	1	0
4	16	0.1	0.29	0.05	CH	CRT↑		1	0	0	1	0
5	17	-0.21	0.18	0.09	EB	CRT↑		1	0	0	0	1
5	18	0	0.18	0.09	CH	CRT↑		1	0	0	1	0
6	19	-0.57	0.16	0.17	CH	CRT↑		1	0	0	1	0
7	20	0.09	0.33	0.09	EB	VRT↑		0	1	0	0	1
7	21	0.11	0.33	0.18	EB	VRT↑		0	1	0	0	1
8	22	0.07	0.1	0.11	EB	VRT↑		0	1	0	0	1
9	23	1.1	0.14	0.48	EB	equal		0	0	1	0	1
10	24	0.29	0.29	0.05	CH	CRT↑		1	0	0	1	0
10	25	-0.02	0.29	0.05	CH	CRT↑		1	0	0	1	0

## Sheet: PF(VRT high)
studyID	effectsizeID	y	v	RM	equipment	loading comparision		CRT	VRT	EQU	CH	EB
1	1	0.09	0.33	0.09	EB	VRT↑		0	1	0	0	1
1	2	0.11	0.33	0.18	EB	VRT↑		0	1	0	0	1
2	3	0.07	0.1	0.11	EB	VRT↑		0	1	0	0	1

## Sheet: PF(EQU)
studyID	effectsizeID	y	v	RM	equipment	loading comparision		CRT	VRT	EQU	CH	EB
1	1	-0.31	0.17	0.09	EB	equal		0	0	1	0	1
1	2	-0.59	0.17	0.21	EB	equal		0	0	1	0	1
1	3	-0.67	0.18	0.13	EB	equal		0	0	1	0	1
1	4	-1.05	0.19	0.3	EB	equal		0	0	1	0	1
2	5	-0.13	0.2	0.12	EB	equal		0	0	1	0	1
2	6	-0.11	0.2	0.21	EB	equal		0	0	1	0	1
2	7	0.3	0.2	0.17	EB	equal		0	0	1	0	1
2	8	0.44	0.2	0.3	EB	equal		0	0	1	0	1
3	9	0.13	0.09	0.2	CH	equal		0	0	1	1	0
3	10	0.26	0.09	0.4	CH	equal		0	0	1	1	0
3	11	0.23	0.09	0.2	CH	equal		0	0	1	1	0
3	12	0.4	0.09	0.4	CH	equal		0	0	1	1	0
3	13	0.41	0.09	0.2	CH	equal		0	0	1	1	0
3	14	0.62	0.09	0.4	CH	equal		0	0	1	1	0
4	15	1.1	0.14	0.48	EB	equal		0	0	1	0	1

## Sheet: PF(CRT high)
studyID	effectsizeID	y	v	RM	equipment	loading comparision		CRT	VRT	EQU	CH	EB
1	1	-0.01	0.29	0.05	CH	CRT↑		1	0	0	1	0
1	2	0.1	0.29	0.05	CH	CRT↑		1	0	0	1	0
2	3	-0.21	0.18	0.09	EB	CRT↑		1	0	0	0	1
2	4	0	0.18	0.09	CH	CRT↑		1	0	0	1	0
3	5	-0.57	0.16	0.17	CH	CRT↑		1	0	0	1	0
4	6	0.29	0.29	0.05	CH	CRT↑		1	0	0	1	0
4	7	-0.02	0.29	0.05	CH	CRT↑		1	0	0	1	0

## Sheet: MF(pooled)
studyID	effectsizeID	y	v	RM	equipment	loading comparision		CRT	VRT	EQU	CH	EB
1	1	0.75	0.21	0.11	EB	equal		0	0	1	0	1
1	2	1.06	0.23	0.22	EB	equal		0	0	1	0	1
1	3	1.46	0.25	0.34	EB	equal		0	0	1	0	1
1	4	2.43	0.35	0.45	EB	equal		0	0	1	0	1
2	5	-0.46	0.17	0.09	EB	equal		0	0	1	0	1
2	6	-0.87	0.18	0.21	EB	equal		0	0	1	0	1
2	7	-0.93	0.18	0.13	EB	equal		0	0	1	0	1
2	8	-1.54	0.22	0.3	EB	equal		0	0	1	0	1
3	9	-0.07	0.18	0.09	EB	CRT↑		1	0	0	0	1
3	10	-0.1	0.18	0.09	CH	CRT↑		1	0	0	1	0
4	11	0.55	0.13	0.48	EB	equal		0	0	1	0	1

## Sheet: MF(EQU)
studyID	effectsizeID	y	v	RM	equipment	loading comparision		CRT	VRT	EQU	CH	EB
1	1	0.75	0.21	0.11	EB	equal		0	0	1	0	1
1	2	1.06	0.23	0.22	EB	equal		0	0	1	0	1
1	3	1.46	0.25	0.34	EB	equal		0	0	1	0	1
1	4	2.43	0.35	0.45	EB	equal		0	0	1	0	1
2	5	-0.46	0.17	0.09	EB	equal		0	0	1	0	1
2	6	-0.87	0.18	0.21	EB	equal		0	0	1	0	1
2	7	-0.93	0.18	0.13	EB	equal		0	0	1	0	1
2	8	-1.54	0.22	0.3	EB	equal		0	0	1	0	1
3	9	0.55	0.13	0.48	EB	equal		0	0	1	0	1

## Sheet: MF(CRT)
studyID	effectsizeID	y	v	RM	equipment	loading comparision		CRT	VRT	EQU	CH	EB
1	1	-0.07	0.18	0.09	EB	CRT↑		1	0	0	0	1
1	2	-0.1	0.18	0.09	CH	CRT↑		1	0	0	1	0

## Sheet: PV(pooled)
studyID	effectsizeID	y	v	RM	equipment	loading comparision		CRT	VRT	EQU	CH	EB
1	1	1.13	0.29	0.36	EB	equal		0	0	1	0	1
1	2	1.33	0.31	0.36	EB	equal		0	0	1	0	1
2	3	1	0.19	0.09	EB	equal		0	0	1	0	1
2	4	1.5	0.22	0.21	EB	equal		0	0	1	0	1
2	5	1	0.19	0.13	EB	equal		0	0	1	0	1
2	6	1.5	0.21	0.3	EB	equal		0	0	1	0	1
3	7	-1.78	0.12	0.2	CH	equal		0	0	1	1	0
3	8	-2.22	0.14	0.4	CH	equal		0	0	1	1	0
3	9	-2	0.13	0.2	CH	equal		0	0	1	1	0
3	10	-2.56	0.16	0.4	CH	equal		0	0	1	1	0
3	11	-1.43	0.11	0.2	CH	equal		0	0	1	1	0
3	12	-1.86	0.12	0.4	CH	equal		0	0	1	1	0
4	13	1	0.15	0.11	EB	CRT↑		1	0	0	0	1
4	14	1	0.15	0.13	EB	CRT↑		1	0	0	0	1
4	15	0.78	0.14	0.16	EB	CRT↑		1	0	0	0	1
5	16	0.03	0.25	0.15	CH	CRT↑		1	0	0	1	0
6	17	0.86	0.17	0.14	CH	CRT↑		1	0	0	1	0
7	18	-0.48	0.29	0.05	CH	CRT↑		1	0	0	1	0
7	19	0.2	0.29	0.05	CH	CRT↑		1	0	0	1	0
8	20	-0.59	0.1	0.11	EB	VRT↑		0	1	0	0	1
9	21	0.38	0.34	0.09	EB	VRT↑		0	1	0	0	1
9	22	-0.94	0.37	0.18	EB	VRT↑		0	1	0	0	1
10	23	-0.5	0.1	0.11	EB	VRT↑		0	1	0	0	1
11	24	-0.3	0.13	0.48	EB	equal		0	0	1	0	1
12	25	0.15	0.29	0.05	CH	CRT↑		1	0	0	1	0
12	26	-0.41	0.29	0.05	CH	CRT↑		1	0	0	1	0

## Sheet: PV(VRT)
studyID	effectsizeID	y	v	RM	equipment	loading comparision		CRT	VRT	EQU	CH	EB
1	1	-0.59	0.1	0.11	EB	VRT↑		0	1	0	0	1
2	2	0.38	0.34	0.09	EB	VRT↑		0	1	0	0	1
3	3	-0.94	0.37	0.18	EB	VRT↑		0	1	0	0	1
4	4	-0.5	0.1	0.11	EB	VRT↑		0	1	0	0	1

## Sheet: PV(EQU)
studyID	effectsizeID	y	v	RM	equipment	loading comparision		CRT	VRT	EQU	CH	EB
1	1	1.13	0.29	0.36	EB	equal		0	0	1	0	1
1	2	1.33	0.31	0.36	EB	equal		0	0	1	0	1
2	3	1	0.19	0.09	EB	equal		0	0	1	0	1
2	4	1.5	0.22	0.21	EB	equal		0	0	1	0	1
2	5	1	0.19	0.13	EB	equal		0	0	1	0	1
2	6	1.5	0.21	0.3	EB	equal		0	0	1	0	1
3	7	-1.78	0.12	0.2	CH	equal		0	0	1	1	0
3	8	-2.22	0.14	0.4	CH	equal		0	0	1	1	0
3	9	-2	0.13	0.2	CH	equal		0	0	1	1	0
3	10	-2.56	0.16	0.4	CH	equal		0	0	1	1	0
3	11	-1.43	0.11	0.2	CH	equal		0	0	1	1	0
3	12	-1.86	0.12	0.4	CH	equal		0	0	1	1	0
4	13	-0.3	0.13	0.48	EB	equal		0	0	1	0	1

[truncated: 17 more sheets: PV(CRT), MV(pooled), MV(VRT), MV(EQU), MV(CRT), Eccentric PV, PP(pooled), PP(VRT), PP(EQU), PP(CRT), MP(pooled), MP(EQU), MP(CRT), RFD(pooled), RFD(VRT), RFD(EQU), RFD(CRT)]
